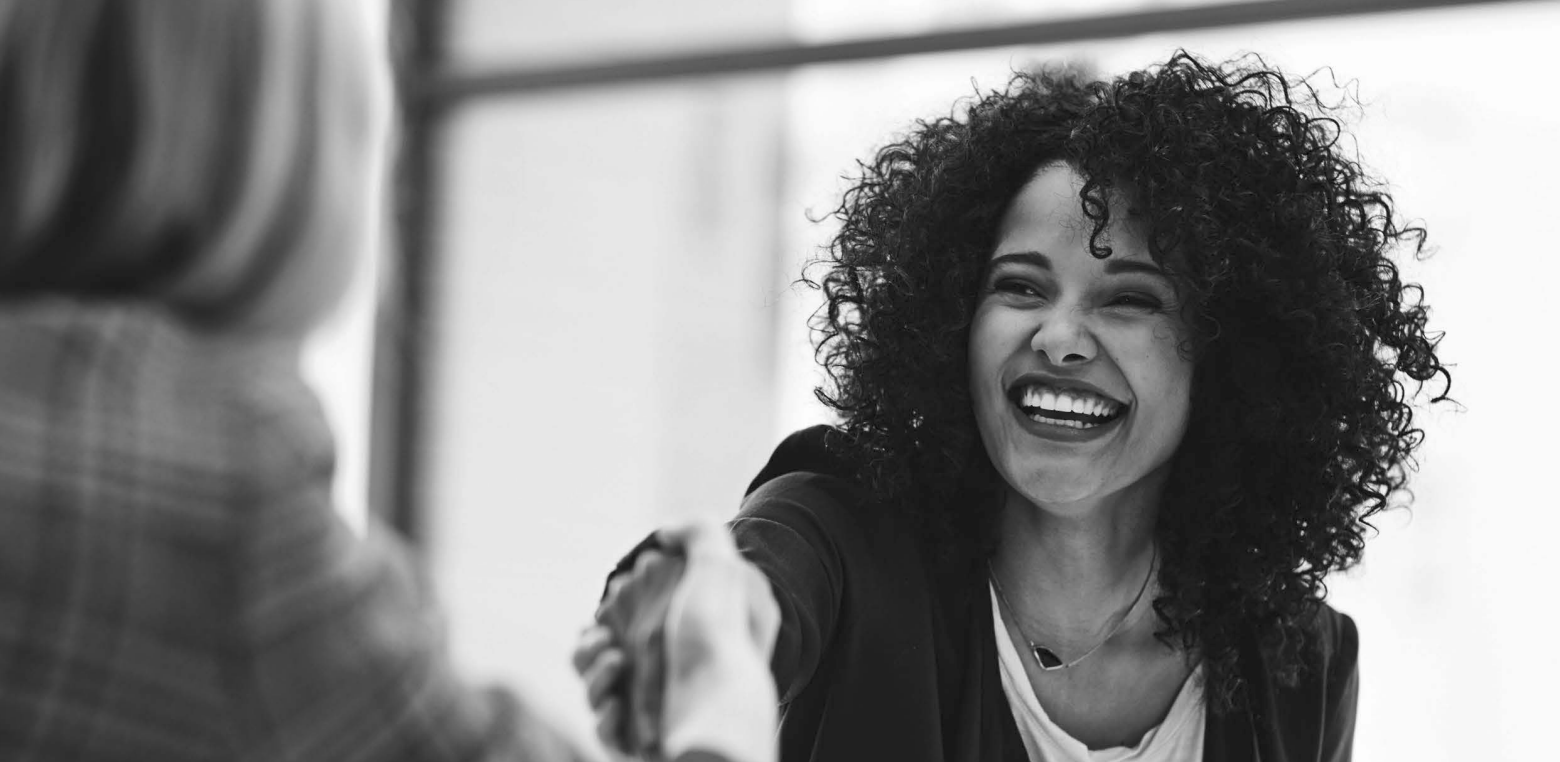

# Searching for the perfect psychiatric career? Let APA JobCentral help!

## Manage Your Career

- Browse hundreds of active job listings!
- Create an account to save jobs, store multiple resumes and cover letters and communicate with employers through our internal messaging system.
- Set up multiple job alerts specifying your skills, interests and location to receive e-mails when employers post jobs that match your criteria.

## Recruit for Open Positions

- Post your job in front of thousands of highly qualified psychiatrists.
- Cross promote your job listing in Psychiatric News.
- Search the anonymous resume database to find your ideal candidate.

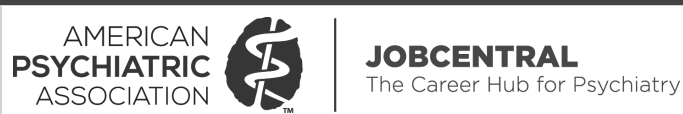

[jobs.psychiatry.org](http://jobs.psychiatry.org)

# Office-Based Buprenorphine Treatment of Opioid Use Disorder, Second Edition

*Edited by John A. Renner Jr., M.D., Petros Levounis, M.D., M.A., and Anna T. LaRose, M.D.*

As the epidemic of opioid misuse and overdose deaths grows in the United States, practical information on evidence-based treatment of opioid use disorder (OUD) becomes increasingly important. This second edition of *Office-Based Buprenorphine Treatment of Opioid Use Disorder* offers just that: accessible and applicable guidance for anyone interested in learning more about prescribing buprenorphine.

Bulleted clinical pearls at the end of each chapter, as well as specific clinical recommendations and detailed case discussions throughout the book, make it easier for readers to retain knowledge and integrate it into their practice.

The guide also features sample documentation and scales, including a treatment contract and a patient consent, that can be used to model documents in practice.

Among the updates in this new edition are chapters that address other pharmacotherapies useful in treating OUD, including methadone and naltrexone, as well as OUD treatment in the context of women's health and pregnancy. As an added bonus, this edition can also be used to complete the 8 hours of qualifying training required for the buprenorphine waiver. By a thorough reading of the material covered in the chapters of this book and successful completion of the posttest, physicians can meet the buprenorphine waiver training requirement.

**JUST PUBLISHED!**

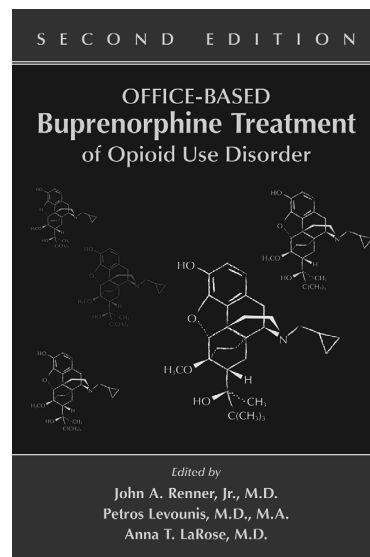

2018 • 395 pages • ISBN 978-1-61537-083-2 • Paperback • \$79.00 • Item #37083

2018 • 395 pages • ISBN 978-1-61537-170-9 • eBook • \$63.00 • Item #37170

AMERICAN  
PSYCHIATRIC  
ASSOCIATION  
PUBLISHING

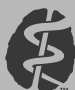

Order online @ [www.appi.org](http://www.appi.org)

or Call Toll Free: 1-800-368-5777

Email: [appi@psych.org](mailto:appi@psych.org)

20% Discount for American Psychiatric Association Members

25% Discount for APA Resident-Fellow Members

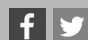

Priority Code AH1813A

# New Titles on Integrated Care

Just Published!

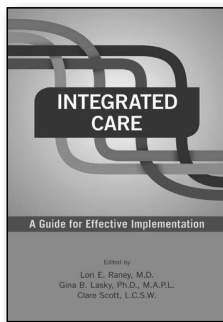

## *Integrated Care*

*A Guide for Effective Implementation*

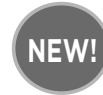

Edited by **Lori E. Raney, M.D., Gina B. Lasky, Ph.D., M.A.P.L., and Clare Scott, L.C.S.W.**

This book provides a detailed, thoughtful, and experience-based guide to the complex and potentially overwhelming process of implementing an integrated care program. The advantages of integrated care from both the clinical and administrative perspectives are many, including better detection of illness, improvement in overall health outcomes, a better

patient care experience, and flexibility in responding to policy and financial changes. The book addresses the emerging framework of core principles for effective integrated care, reviews the most up-to-date research on implementation, and presents practice-based experience to serve as a guide. This information is useful in both traditional integration of behavioral health into general medical settings or integrating general medical care into a specialty mental health or substance use treatment setting. Because administrators, clinicians, policy makers, payers and others need guidance in determining what effective implementation looks like, the authors offer a three-part examination of the key components of an implementation strategy and explore the elements essential for success.

2017 • 290 pages • ISBN 978-1-61537-054-2 • Paperback • \$59.00 • Item #37054

2017 • 290 pages • ISBN 978-1-61537-133-4 • eBook • \$47.00 • Item #37133

## *Study Guide to Preventive Medical Care in Psychiatry*

*A Case Approach*

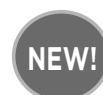

Edited by **Robert M. McCarron, D.O., Glen L. Xiong, M.D., Craig R. Keenan, M.D., Lorin M. Scher, M.D., Jaesu Han, M.D., and Mark E. Servis, M.D.**

*Study Guide to Preventive Medical Care in Psychiatry: A Case Approach* is an indispensable companion to *Preventive Medical Care in Psychiatry: A Practical Guide for Clinicians*. Like the primary text, the study guide was written by experts in the field and it reflects the text's focus on clinical care for psychiatrists and other mental health care providers who work in outpatient mental health and integrated clinics. Through the deft use of clinical cases, the study guide helps providers and trainees acquire the knowledge and skills necessary to view the patient holistically and improve outcomes.

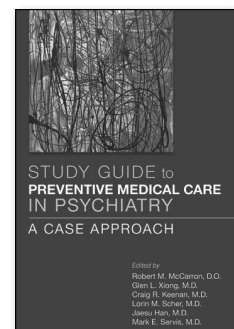

2017 • 313 pages • ISBN 978-1-61537-057-3 • Paperback • \$59.00 • Item #37057

2017 • 313 pages • ISBN 978-1-61537-116-7 • eBook • \$47.00 • Item #37116

Order Now

[www.appi.org](http://www.appi.org)

20% Discount for American Psychiatric Association Members  
25% Discount for APA Resident-Fellow Members

Please use Priority Code AH1737 when ordering.

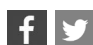

AMERICAN  
PSYCHIATRIC  
ASSOCIATION  
PUBLISHING

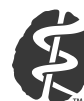

[www.appi.org](http://www.appi.org)

Email: [appi@psych.org](mailto:appi@psych.org)

Toll Free: 1-800-368-5777

## Competency in Combining Pharmacotherapy and Psychotherapy Integrated and Split Treatment, Second Edition

### Core Competencies in Psychotherapy

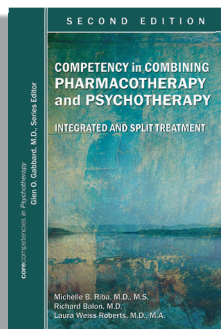

Michelle B. Riba, M.D., M.S.,  
Richard Balon, M.D., and  
Laura Weiss Roberts, M.D., M.A.

Series Editor: Glen O. Gabbard, M.D.

This book is designed to help psychiatrists at any stage of their career achieve competency in combining and coordinating pharmacotherapeutic and psychotherapeutic treatments for the benefit of their patients.

2018 • 175 pages • ISBN 978-1-61537-066-5 • Paperback • \$65.00 • Item #37066

2018 • 175 pages • ISBN 978-1-61537-180-8 • eBook • \$52.00 • Item #37180

AMERICAN  
PSYCHIATRIC  
ASSOCIATION  
PUBLISHING

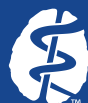

Order @ [www.appi.org](http://www.appi.org)  
Email: [appi@psych.org](mailto:appi@psych.org)  
Phone: 1-800-368-5777

AH1805A

# Our Work Matters

Hope. Recovery. Wellbeing.

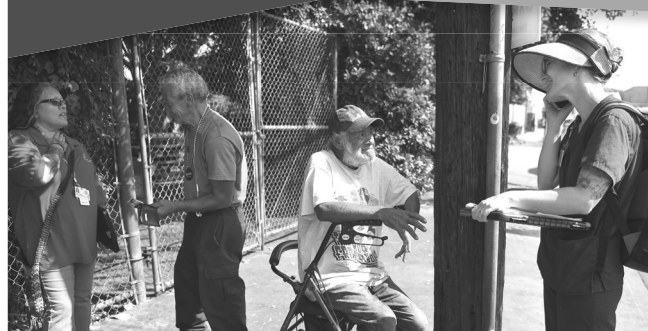

## Join us and make a difference for those who need it the most.

Los Angeles County Department of Mental Health is a nationally recognized leader providing a wide range of services to one of the largest populations in the country. We invite you to join our team as we help the most vulnerable in our community find a path to independence and personal recovery.

Starting annual salary immediately post residency completion is **\$233,784** with **potential bonuses of \$32,000 annually**. Student **loan repayment** and recruitment incentives available.

[www.psychiatristjobs.la](http://www.psychiatristjobs.la)

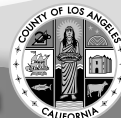

Visit [ps.psychiatryonline.org](http://ps.psychiatryonline.org) for these features!

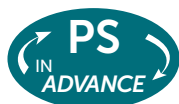

Discover the latest research before it appears in print

**Benzodiazepine Use and Misuse Among Adults in the United States**

**Decision Making About Pathways Through Care for Racially and Ethnically Diverse Young Adults With Early Psychosis**

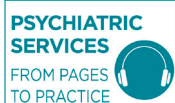

Listen to our podcast, *Psychiatric Services From Pages to Practice*, and learn about the latest mental health services research and why it is relevant.

**Episode 19:** Malingering, *13 Reasons Why* Impact Among Youths, PHQ-9 Item 9 as a Predictor of Suicidal Behavior

**Episode 18:** Leadership, Measurement-Based Care, and a Reward Policy for Family Care

Receive free alerts to new content, including Editor's Choice curated topic collections (<http://appi.org/etocs>).

AMERICAN  
PSYCHIATRIC  
ASSOCIATION  
PUBLISHING

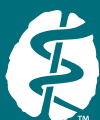

[ps.psychiatryonline.org](http://ps.psychiatryonline.org)

[www.appi.org](http://www.appi.org) • 1-800-368-5777 • e-mail: [appi@psych.org](mailto:appi@psych.org)

Keep up with the latest from *Psychiatric Services* on Facebook ([facebook.com/PsychiatryOnline](https://facebook.com/PsychiatryOnline)) and Twitter (@APAPubPsychSvc).

# Psychiatric Research and Clinical Practice

Edited by Kimberly A. Yonkers, M.D.

An Open-Access Journal From the American Psychiatric Association

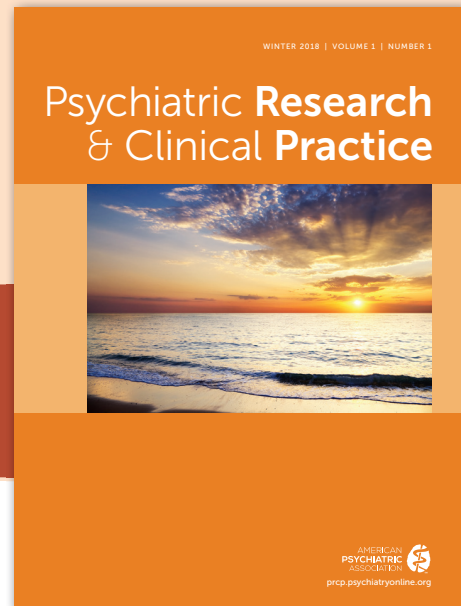

Psychiatric Research and Clinical Practice (PRCP) is a new peer-reviewed, open-access journal from the American Psychiatric Association that offers a high-profile publishing destination for peer-reviewed submissions that build upon the psychiatric knowledge base and bring research findings closer to clinical utility through deeper investigation.

Submissions on all aspects of mental and behavioral health to inform the field from bench to bedside are welcome. PRCP seeks to occupy that place between research and clinical utility, leaning toward clinical utility through publication of replication studies and features that show how new scientific knowledge can inform clinical practice. The journal will also feature “Clinical Pearls”—accounts by clinicians using the findings from the most up-to-date clinical research to help solve problems commonly confronted in clinical practice.

PRCP maintains the rigorous standards of APA’s scholarly publications while providing an essential resource for today’s practicing physicians. Published in accordance with open-access principles, PRCP makes all of its content immediately available for free—the reach one wants from an established and respected publisher.

Psychiatric Research and Clinical Practice is committed to keeping the field of psychiatry vibrant and relevant by publishing wide-ranging information on all aspects of mental and behavioral health and enhancing APA’s leadership role in scientific publishing in psychiatry by expanding the amount of research, clinical practice, and systems of care content available to the field.

## About the Editor

Kimberly A. Yonkers, M.D., is Professor of Psychiatry, Epidemiology, Obstetrics/Gynecology, and Reproductive Sciences and Director of the Center for Wellbeing of Women and Mothers at Yale University. She brings to the task of serving as PRCP’s Editor a broad and deep experience in research and clinical work. Her research includes investigations into the clinical course, etiopathology, and treatment of psychiatric disorders as they occur in women. A major component of this work includes investigations into the occurrence and treatment of illnesses in pregnancy and the postpartum period and across the menstrual cycle. This area, by its nature, cuts across disciplines and requires psychiatric expertise as well as knowledge in neuroscience and reproductive biology. Her work has also included determining optimal methods for screening and treating women for substance use problems when they are pregnant or postpartum.
