# Psychiatric Services

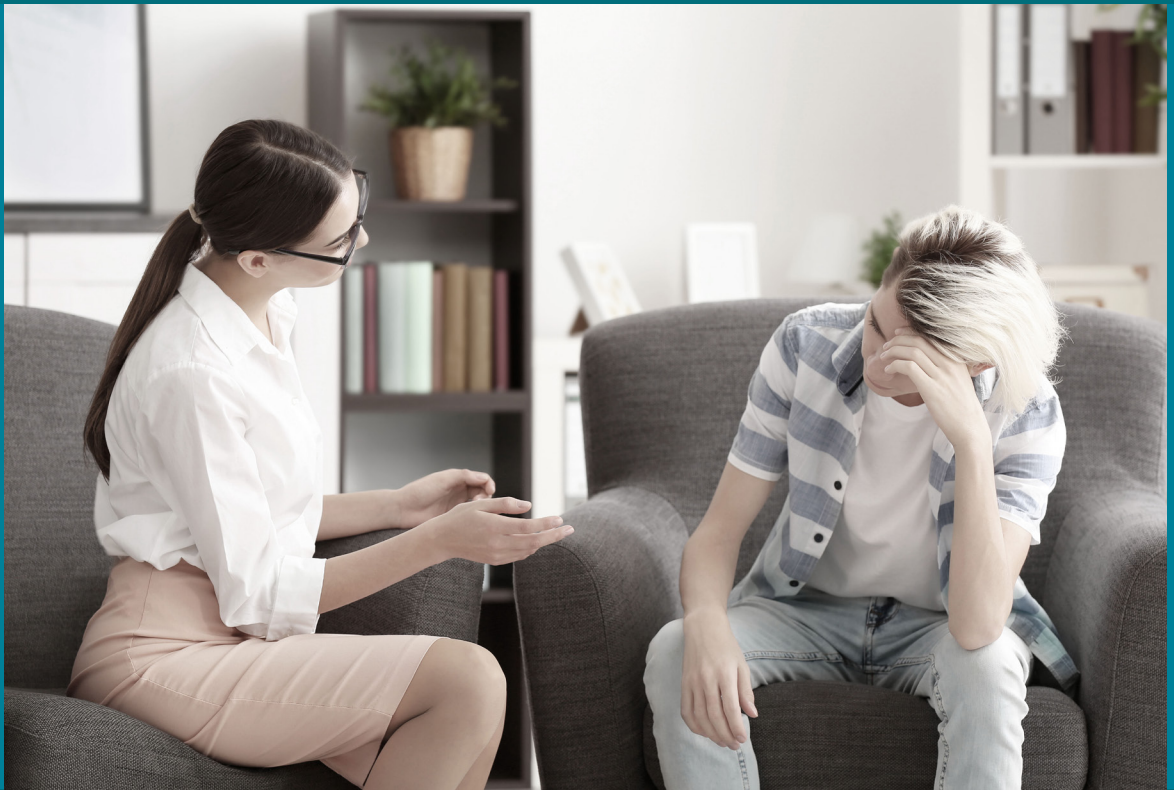

Mental health service use among college students: 10-year trends

Gender identity among patients with serious mental illness

Mental health practitioner attitudes toward feedback

Open Dialogue: a review of the evidence
