## Introducing Editor's Choice

A monthly curated collection of articles from Lisa B. Dixon, M.D., M.P.H.

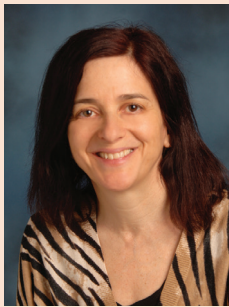

Lisa B. Dixon, M.D., M.P.H.

Each monthly collection will focus on one topic—summarizing for the researcher, clinician, and policy analyst the latest information and seminal research available from *Psychiatric Services*.

Upcoming collections:

- Integrated Care
- Recovery-Oriented Care
- Peer Services
- Child Psychiatry

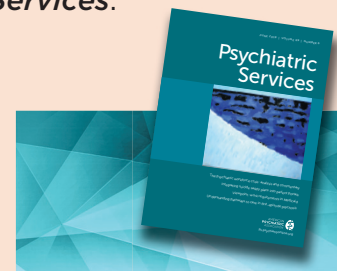

Sign up at <http://appi.org/etocs>

## Culture, Heritage, and Diversity in Older Adult Mental Health Care

Edited by Maria Llorente, M.D., FAPA  
APA Council on Geriatric Psychiatry

The term culture is multifaceted and may refer to one's belief system, values, religion, race, socioeconomic status, ethnicity, language, sexual orientation, geographic location, educational level, age, occupational risks and exposures, and gender. Cultural competence in health care systems is defined as the ability to understand and integrate the features listed above into the provision of health care services. *Culture, Heritage, and Diversity in Older Adult Mental Health Care* prepares clinicians to provide sensitive, high-quality, culturally competent care to geriatric patients from diverse backgrounds and will prove indispensable as patient demographics continue to change.

AMERICAN  
PSYCHIATRIC  
ASSOCIATION  
PUBLISHING

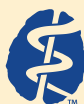

[appi.org](http://appi.org)  
Email: [appi@psych.org](mailto:appi@psych.org)  
Toll Free: 1-800-368-5777

20% Discount for American Psychiatric Association Members  
25% Discount for APA Resident-Fellow Members

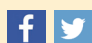

Priority Code AH1832

NEW!

CULTURE,  
HERITAGE, AND  
DIVERSITY IN  
Older Adult Mental  
Health Care

Edited by  
Maria D. Llorente, M.D., FAPA  
APA Council on Geriatric Psychiatry

2019 • 320 pages  
ISBN 978-1-61537-205-8  
Paperback • \$57.00  
Item #37205
